# Supplementary material for: Unbiased Metagenomic Sequencing for Pediatric Meningitis in Bangladesh Reveals Neuroinvasive Chikungunya Virus Outbreak and Other Unrealized Pathogens
Source: PubMed Central journal article supplement (PMC6918088; doi:10.1128/mbio.02877-19), 2019-12-17

Figure S1. Schematic representation of the bioinformatic approach in IDSEQ for pathogen identification.

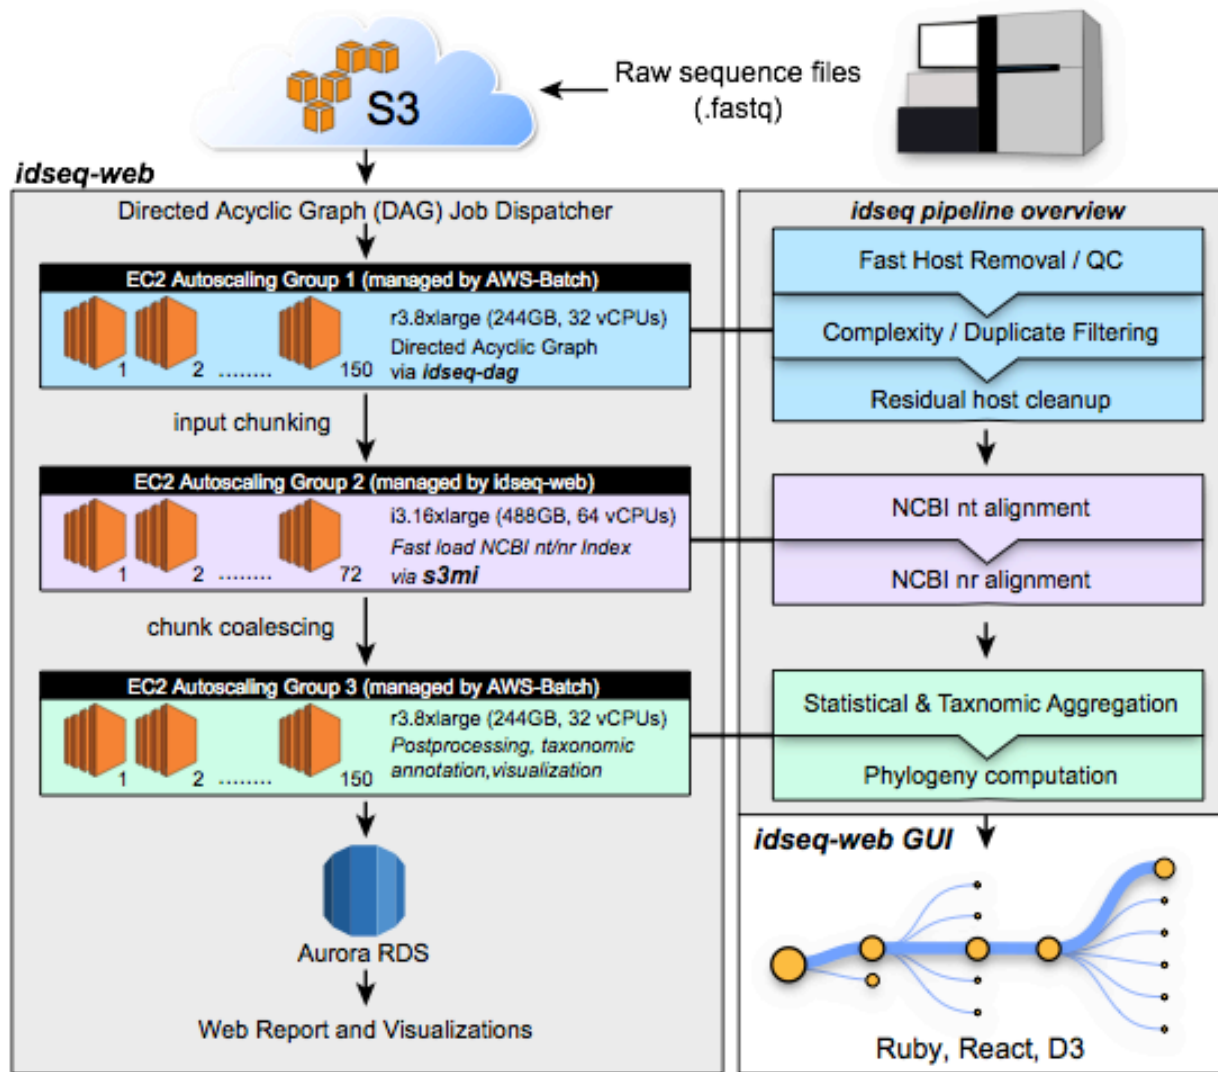

Supplement: mBio.02877-19-sf001.pdf [file mBio.02877-19-sf001.pdf]
