# Supplementary material for: Unbiased Metagenomic Sequencing for Pediatric Meningitis in Bangladesh Reveals Neuroinvasive Chikungunya Virus Outbreak and Other Unrealized Pathogens
Source: PubMed Central journal article supplement (PMC6918088; doi:10.1128/mbio.02877-19), 2019-12-17

Figure S2. **Residential locations of all selected cases and CHIKV-positive meningitis cases.** A. The map of Bangladesh depicting national distribution of all cases. B. Magnified map of Dhaka division from where majority of cases arrived. C The map of Bangladesh depicting national distribution of all CHIKV-positive meningitis cases during the outbreak of 2017. D. Magnified map of Dhaka division from where almost of CHIKV-meningitis cases arrived from during the outbreak in 2017.

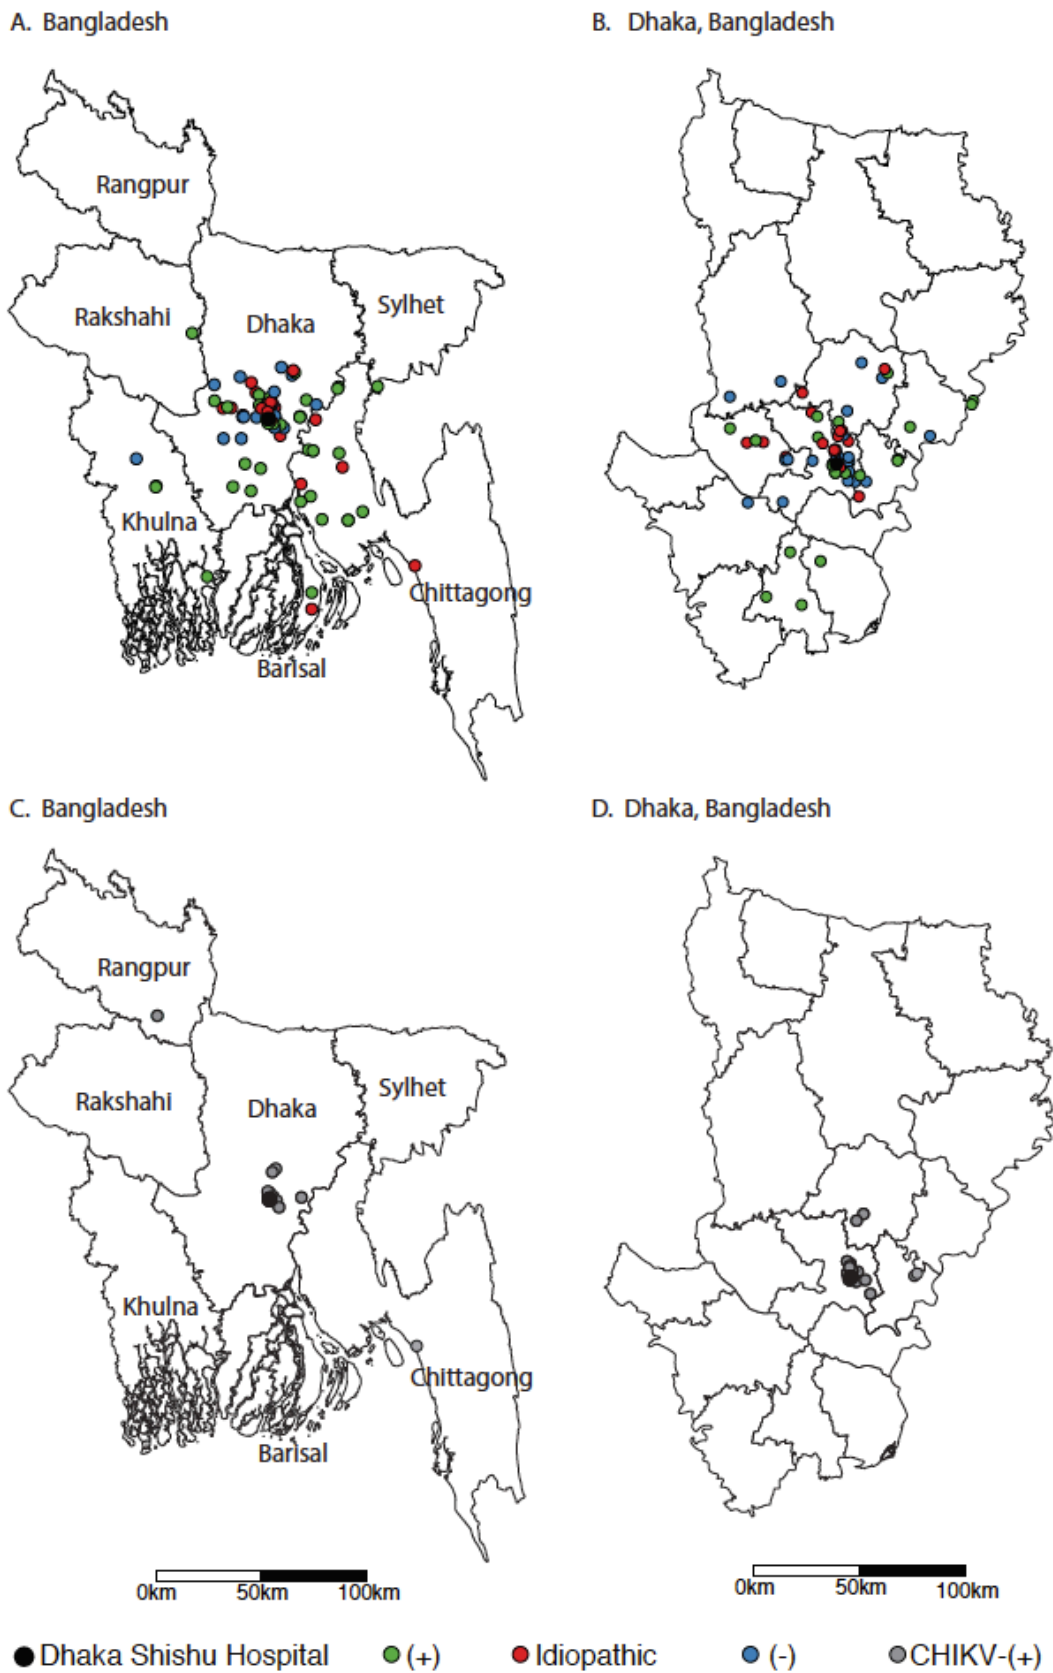

Supplement: mBio.02877-19-sf002.pdf [file mBio.02877-19-sf002.pdf]
