# Supplementary material for: Unbiased Metagenomic Sequencing for Pediatric Meningitis in Bangladesh Reveals Neuroinvasive Chikungunya Virus Outbreak and Other Unrealized Pathogens
Source: PubMed Central journal article supplement (PMC6918088; doi:10.1128/mbio.02877-19), 2019-12-17
Supplement: mBio.02877-19-st001.pdf [file mBio.02877-19-st001.pdf]

**Table S1. WHO-defined clinical criteria used to enroll children in the meningitis surveillance in Dhaka Shishu Hospital, Bangladesh.**

| <b>WHO case definition</b> | <b>Inclusion criteria</b>                                                                                                                                                                                                                                                                                                                                                                                                                                                                                                                                                            |
|----------------------------|--------------------------------------------------------------------------------------------------------------------------------------------------------------------------------------------------------------------------------------------------------------------------------------------------------------------------------------------------------------------------------------------------------------------------------------------------------------------------------------------------------------------------------------------------------------------------------------|
| Meningitis                 | <p>Any child aged 0-59 months hospitalized with sudden onset of fever &gt;100.4 °F and one of the following signs:</p> <ul style="list-style-type: none"> <li>• Stiff neck</li> <li>• Altered or reduced level of consciousness</li> <li>• Bulging fontanel (if &lt; 12 months of age)</li> <li>• Prostration/lethargy</li> <li>• Convulsions</li> <li>• Toxic appearance</li> <li>• Petechial or purpuric rash</li> <li>• Poor Sucking</li> <li>• Irritability (&gt;2 months)</li> </ul> <p>Or any child aged 0-59 months hospitalized with a clinical diagnosis of meningitis.</p> |
