# Supplementary material for: Unbiased Metagenomic Sequencing for Pediatric Meningitis in Bangladesh Reveals Neuroinvasive Chikungunya Virus Outbreak and Other Unrealized Pathogens
Source: PubMed Central journal article supplement (PMC6918088; doi:10.1128/mbio.02877-19), 2019-12-17
Supplement: mBio.02877-19-st002.pdf [file mBio.02877-19-st002.pdf]

**Table S2. Detection of Chikungunya virus and orthogonal confirmation of probable pathogens through qPCR.** For CHIKV confirmation, we used qScript XLT 1-Step RT-qPCR ToughMix Low-ROX (Cat. No. 95134-100). For the remaining confirmations, we used Quantabio PerfeCTa qPCR ToughMix, Low Rox (Cat. No. 95114-012). For reverse transcription, we used Quantabio qScript cDNA Super Mix (Cat. No. 95048-100): 25°C for 5 min, 42°C for 30 min, 85°C for 5 min.

| Sample ID                             | Pathogen                   | Template   | Primers                                                                                                                                  | Probes                                                                                                       | qPCR conditions                                                                                        |
|---------------------------------------|----------------------------|------------|------------------------------------------------------------------------------------------------------------------------------------------|--------------------------------------------------------------------------------------------------------------|--------------------------------------------------------------------------------------------------------|
| CHRF_0012,<br>CHRF_0071,<br>CHRF_0094 | CHIKV                      | Whole CSF* | F:5'AAAGGGCAAACCTC<br>AGCTTCAC; R:<br>5'GCCTGGGCTCATCGT<br>TATTC                                                                         | FAM-<br>CACCGACGGCGA<br>GACCGACTTT-<br>BHQ1                                                                  | 50°C for 10 min, 95°C for 1<br>min, 45 cycles of 95°C for<br>15 s, 60°C for 1 min.                     |
| CHRF_0010                             | Enterovirus<br>B           | CSF-RNA    | F:5'CCTGAATGCGGCT<br>AATCC; R:5'TTGTACCATWAG<br>CAGYCA                                                                                   | FAM-<br>CCGACTACTTTGG<br>GWGTCCGTGT-<br>BHQ1                                                                 | 95°C for 30 s, 40 cycles:<br>95°C for 15 s, 60°C for 30 s                                              |
| CHRF_0011,<br>CHRF_0036               | Mumps                      | CSF-RNA    | F:5'GTATGACAGCGTA<br>CGACCAACCT;<br>R:5'GCGACCTTGCTGC<br>TGGTATT 3'                                                                      | FAM-<br>CCGGTCTGCTGA<br>TCGGCGAT-BHQ                                                                         | 95°C for 30 s, 40 cycles:<br>95°C for 5 s, 60°C for 15 s,<br>70°C for 10 s                             |
| CHRF_0059                             | <i>S.<br/>maltophilia</i>  | CSF-RNA    | F:5'GCCGAAAGCCCAA<br>GGTTT; R:5'CGACTTTCGTCCTC<br>GCCTTA 3'                                                                              | FAM-<br>CGCAACGTTAATC<br>GGCGCAGG-<br>TAMRA                                                                  | 95°C for 30 s, 40 cycles:<br>95°C for 5 s, 60°C for 15 s,<br>70°C for 10 s                             |
| CHRF_0082                             | <i>S. enterica</i>         | Whole CSF  | F:5'CTCACCAGGAGAT<br>TACAACATGG;<br>R:5'AGCTCAGACCAA<br>AGTGACCATC                                                                       | FAM-<br>CACCGACGGCGA<br>GACCGACTTT-<br>BHQ1                                                                  | 95°C for 30 s, 40 cycles:<br>95°C for 15 s, 60°C for 30 s                                              |
| CHRF_0058                             | <i>M.<br/>tuberculosis</i> | Whole CSF  | F:5'GTCGAACGGCTGA<br>TGACCAAACCT;<br>R:5'TCCGAAGCGGCGC<br>TGGACGA;<br>F1:5'AACGGCTGATGA<br>CCAAACTC 3';<br>R1:5'AAGCGGCGCTGG<br>ACGAGATC | Probe1: FAM-<br>ACCACGATCGCT<br>GATCCGGCCACA-<br>BHQ1; Probe2:<br>FAM-<br>ACCCGCGGCAAA<br>GCCCGCAGG-<br>BHQ1 | 95°C for 10 min, 95°C 10<br>min; 10 cycles: 95°C 15 s,<br>65°C 30 s; 40 cycles: 95°C<br>15s, 60°C 30 s |
| CHRF_0070                             | <i>B. cereus</i>           | Whole CSF  | F:5'ACTGTATTAGAA<br>GGGCGCGG;<br>R:5'TAAAGCCACCGCC<br>AAGTACA 3'                                                                         | N/A                                                                                                          | 95°C for 10 min, 95°C for 30<br>s , 40 cycles: 95°C for 5 s,<br>57°C for 15 s, 70°C for 10 s           |
