# Supplementary material for: Unbiased Metagenomic Sequencing for Pediatric Meningitis in Bangladesh Reveals Neuroinvasive Chikungunya Virus Outbreak and Other Unrealized Pathogens
Source: PubMed Central journal article supplement (PMC6918088; doi:10.1128/mbio.02877-19), 2019-12-17
Supplement: mBio.02877-19-st003.pdf [file mBio.02877-19-st003.pdf]

Table S3. Case-based clinical and laboratory metadata of all cases included in this study (n=115).

| Sample ID | DSH result       | Age (m) | CSF collection date | WBC/ul (PMN%)/ Protein mg/dl | Hospital duration/ outcome | Organism detected in DSH  | qPCR Ct | Provisional/ Final Diagnosis          |
|-----------|------------------|---------|---------------------|------------------------------|----------------------------|---------------------------|---------|---------------------------------------|
| CHRF0052  | Culture (+)      | f/3     | 14-Nov-17           | 6000 (90)/600                | 21/Dis                     | <i>E. coli</i>            | -       | Sepsis/Hydrocephalus                  |
| CHRF0064  | Culture (+)      | m/81    | 6-Jun-16            | 24000 (95)/1000              | 12/Dis                     | <i>S. pneumoniae</i>      | -       | Meningoencephalitis/Meningitis        |
| CHRF0076  | Culture (+)      | m/6     | 20-Feb-15           | 860 (90)/300                 | 1/LAMA                     | <i>S. pneumoniae</i>      | -       | Meningitis/Meningitis                 |
| CHRF0088  | Culture (+)      | f/0     | 25-Sep-16           | 750 (90)/500                 | 32/Dis                     | <i>Flavobacterium sp.</i> | -       | Meningitis/Meningitis                 |
| CHRF0005  | Culture (+)      | m/0     | 5-Jun-16            | 3500 (90)/700                | 23/Dis                     | <i>Enterobacter sp.</i>   | -       | perinatal asphyxia/Meningitis         |
| CHRF0017  | Culture (+)      | m/132   | 13-Mar-16           | 2600 (90)/150                | 24/Dis                     | <i>E. coli</i>            | -       | Meningitis/Meningitis                 |
| CHRF0029  | Culture (+)      | f/0     | 10-Jan-16           | 280 (85)/300                 | 38/LAMA                    | <i>Flavobacterium sp.</i> | -       | perinatal asphyxia/perinatal asphyxia |
| CHRF0041  | Culture (+)      | m/6     | 03-Nov-12           | 250 (50)/300                 | 76/Dis                     | <i>K. pneumoniae</i>      | -       | Meningitis/Hydrocephalus              |
| CHRF0001  | Antigen, PCR (+) | m/0     | 16-May-17           | 250 (80)/300                 | 15/Dis                     | <i>S. pneumoniae</i>      | 32.9    | Meningitis/Meningitis                 |
| CHRF0013  | Antigen, PCR (+) | m/4     | 7-Mar-17            | 74 (25)/60                   | 13/Dis                     | <i>S. pneumoniae</i>      | 36      | Meningitis/Meningitis                 |
| CHRF0025  | Antigen, PCR (+) | f/3     | 19-Mar-17           | 52 (10)/200                  | 15/Dis                     | <i>S. pneumoniae</i>      | 27.2    | Meningitis/Meningitis                 |
| CHRF0037  | Antigen, PCR (+) | m/60    | 18-Feb-17           | 5000 (90)/250                | 15/Dis                     | <i>S. pneumoniae</i>      | 28.7    | Meningoencephalitis/Meningitis        |
| CHRF0049  | Antigen, PCR (+) | 100     | 5-Sep-17            | 2000 (80)/800                | 14/Dis                     | <i>S. pneumoniae</i>      | 26.5    | Meningitis/Meningitis                 |
| CHRF0061  | Antigen, PCR (+) | f/4     | 10-Apr-17           | 32000 (90)/300               | 26/Dis                     | <i>S. pneumoniae</i>      | 21.5    | Meningitis/Pneumonia                  |
| CHRF0073  | Antigen, PCR (+) | m/1     | 10-Apr-17           | 4000 (95)/700                | 7/Died                     | <i>S. pneumoniae</i>      | 23.4    | Meningitis/Meningitis                 |
| CHRF0085  | Antigen, PCR (+) | f/4     | 28-Mar-17           | 3200 (85)/500                | 26/Dis                     | <i>S. pneumoniae</i>      | 27.1    | Meningitis/Meningitis                 |
| CHRF0002  | Antigen, PCR (+) | m/3     | 27-Feb-17           | 80 (60)/300                  | 7/LAMA                     | <i>S. pneumoniae</i>      | 19.2    | Meningitis/Meningitis                 |
| CHRF0014  | Antigen, PCR (+) | m/7     | 26-Feb-17           | 10000 (90)/400               | 5/LAMA                     | <i>S. pneumoniae</i>      | 27.6    | Meningitis/Meningitis                 |
| CHRF0026  | Antigen, PCR (+) | m/108   | 30-Aug-17           | 700 (90)/300                 | 9/Died                     | <i>S. pneumoniae</i>      | 19      | NS/NS                                 |
| CHRF0038  | Antigen, PCR (+) | m/79    | 19-Mar-16           | 4800 (80)/300                | 10/Dis                     | <i>S. pneumoniae</i>      | 29.7    | Meningitis/Meningitis                 |
| CHRF0050  | Antigen, PCR (+) | f/6     | 16-Mar-16           | 140 (70)/150                 | 2/Dis                      | <i>S. pneumoniae</i>      | 31.8    | Meningitis/Meningitis                 |
| CHRF0062  | Antigen, PCR (+) | f/9     | 7-May-16            | 2500 (90)/250                | 12/Dis                     | <i>S. pneumoniae</i>      | 23.8    | Meningitis/Meningitis                 |
| CHRF0074  | Antigen, PCR (+) | f/85    | 27-Jun-16           | 3000 (85)/350                | 18/Dis                     | <i>S. pneumoniae</i>      | 27.7    | Meningitis/Meningitis                 |
| CHRF0086  | Antigen, PCR (+) | m/6     | 14-Dec-15           | 550 (90)/300                 | 14/Dis                     | <i>S. pneumoniae</i>      | 26.2    | Meningitis/Meningitis                 |
| CHRF0003  | Antigen, PCR (+) | m/71    | 18-Jan-15           | 9600 (90)/220                | 14/Dis                     | <i>S. pneumoniae</i>      | 16.3    | ICSOL/Meningitis                      |
| CHRF0015  | Antigen (+)      | m/78    | 22-Mar-15           | 80 (10)/15                   | 18/Dis                     | <i>S. pneumoniae</i>      | NA      | NS/NS                                 |
| CHRF0027  | Antigen, PCR (+) | m/1     | 27-Sep-17           | 1300 (80)/250                | 15/Dis                     | <i>H. influenzae</i>      | 28.4    | Meningitis/Meningitis                 |

| Sample ID | DSH result       | Age (m) | CSF collection date | WBC/ul (PMN%)/ Protein mg/dl | Hospital duration/ outcome | Organism detected in DSH | qPCR Ct | Provisional/ Final Diagnosis            |
|-----------|------------------|---------|---------------------|------------------------------|----------------------------|--------------------------|---------|-----------------------------------------|
| CHRF0039  | Antigen, PCR (+) | f/4     | 4-Sep-16            | 950 (85)/70                  | 9/Dis                      | <i>S. pneumoniae</i>     | 34.1    | Meningitis/Meningitis                   |
| CHRF0051  | Antigen, PCR (+) | m/3     | 14-May-16           | 6500 (90)/200                | 12/Dis                     | <i>S. pneumoniae</i>     | 21.3    | Meningitis/Meningitis                   |
| CHRF0063  | Antigen, PCR (+) | f/40    | 22-Jul-16           | 2400 (90)/200                | 9/Dis                      | <i>N. meningitidis</i>   | 33      | Meningitis/Meningitis                   |
| CHRF0075  | Antigen, PCR (+) | m/72    | 16-Feb-15           | 3400 (90)/200                | 27/Dis                     | <i>S. pneumoniae</i>     | 29.3    | Meningoencephalitis/Meningoencephalitis |
| CHRF0087  | Antigen, PCR (+) | f/82    | 27-Nov-17           | 1600 (90)/80                 | 28/Dis                     | <i>S. pneumoniae</i>     | 31.7    | Meningoencephalitis/Meningitis          |
| CHRF0004  | Antigen, PCR (+) | m/61    | 9-Sep-17            | 220 (10)/100                 | 14/Dis                     | <i>S. pneumoniae</i>     | 35.5    | Meningitis/Meningitis                   |
| CHRF0016  | Antigen (+)      | f/4     | 5-Oct-17            | 10 (60)/150                  | 32/Dis                     | <i>S. pneumoniae</i>     | NA      | Encephalitis/Meningitis                 |
| CHRF0028  | Antigen, PCR (+) | m/55    | 30-Oct-17           | 28 (30)/100                  | 8/Dis                      | <i>S. pneumoniae</i>     | 33.2    | Meningitis/Meningitis                   |
| CHRF0040  | Antigen, PCR (+) | m/9     | 18-Dec-17           | 280 (15)/160                 | 12/Dis                     | <i>S. pneumoniae</i>     | 36      | Pneumonia                               |
| CHRF0053  | (-)              | f/12    | 23-Jul-14           | 0 (0)/15                     | 3/Dis                      | -                        | -       | UTI/AGE                                 |
| CHRF0065  | (-)              | m/8     | 24-Jul-14           | 0 (0)/20                     | 2/Dis                      | -                        | -       | AFC/AFC                                 |
| CHRF0077  | (-)              | m/5     | 19-Sep-14           | 0 (0)/25                     | 4/Dis                      | -                        | -       | AFC/AFC                                 |
| CHRF0089  | (-)              | f/12    | 21-Sep-14           | 0 (0)/30                     | 3/Dis                      | -                        | -       | AFC/AFC                                 |
| CHRF0006  | (-)              | f/5     | 21-Sep-14           | 0 (0)/15                     | 4/Dis                      | -                        | -       | Meningitis/ARI                          |
| CHRF0018  | (-)              | f/24    | 24-Sep-14           | 0 (0)/15                     | 2/Dis                      | -                        | -       | Meningitis/AFC                          |
| CHRF0030  | (-)              | m/14    | 29-Sep-14           | 0 (0)/15                     | 3/Dis                      | -                        | -       | AFC/AFC                                 |
| CHRF0042  | (-)              | m/0     | 12-Oct-14           | 0 (0)/20                     | 4/Dis                      | -                        | -       | Perinatal asphyxia/Perinatal asphyxia   |
| CHRF0054  | (-)              | m/12    | 30-Oct-14           | 0 (0)/25                     | 3/Dis                      | -                        | -       | Meningitis/AFC                          |
| CHRF0066  | (-)              | m/16    | 21-Nov-14           | 0 (0)/25                     | 3/Dis                      | -                        | -       | AFC/AFC                                 |
| CHRF0078  | (-)              | m/14    | 16-Jan-15           | 0 (0)/20                     | 4/Dis                      | -                        | -       | AFC/AFC                                 |
| CHRF0090  | (-)              | m/12    | 22-Jan-15           | 0 (0)/15                     | 4/Dis                      | -                        | -       | AFC/AFC                                 |
| CHRF0007  | (-)              | f/8     | 29-Jan-15           | 0 (0)/20                     | 4/Dis                      | -                        | -       | Meningitis/AFC                          |
| CHRF0019  | (-)              | f/12    | 1-Feb-15            | 0 (0)/20                     | 4/Dis                      | -                        | -       | Meningitis/AFC                          |
| CHRF0031  | (-)              | m/9     | 2-Feb-15            | 0 (0)/15                     | 3/Dis                      | -                        | -       | Down's syndrome/AFC                     |
| CHRF0043  | (-)              | f/5     | 5-Feb-15            | 0 (0)/20                     | 2/Dis                      | -                        | -       | AFC/AFC                                 |
| CHRF0055  | (-)              | m/43    | 3-Feb-18            | 4 (0)/20                     | 3/Dis                      | -                        | -       | AFC/AFC                                 |
| CHRF0067  | (-)              | f/28    | 3-Feb-18            | 2 (0)/20                     | 3/Dis                      | -                        | -       | AFC/AFC                                 |
| CHRF0079  | (-)              | f/8     | 5-Feb-18            | 2 (0)/20                     | 5/Dis                      | -                        | -       | AFC/AFC                                 |
| CHRF0091  | (-)              | m/17    | 10-Feb-18           | 2 (0)/20                     | 3/Dis                      | -                        | -       | AFC/AFC                                 |
| CHRF0008  | (-)              | m/15    | 11-Feb-18           | 2 (0)/15                     | 3/Dis                      | -                        | -       | AFC/AFC                                 |
| CHRF0020  | (-)              | m/6     | 11-Feb-18           | 2 (0)/20                     | 3/Dis                      | -                        | -       | Meningitis/AFC                          |

| Sample ID | DSH result | Age (m) | CSF collection date | WBC/ul (PMN%)/ Protein mg/dl | Hospital duration/ outcome | Organism detected in DSH | qPCR Ct | Provisional/ Final Diagnosis            |
|-----------|------------|---------|---------------------|------------------------------|----------------------------|--------------------------|---------|-----------------------------------------|
| CHRF0032  | (-)        | m/6     | 15-Feb-18           | 4 (0)/20                     | 3/Dis                      | -                        | -       | Pseudotumor cerebri/Pseudotumor cerebri |
| CHRF0044  | (-)        | f/27    | 15-Feb-18           | 2 (0)/20                     | 3/Dis                      | -                        | -       | Pseudotumor cerebri                     |
| CHRF0056  | (-)        | f/18    | 20-Feb-18           | 2 (0)/20                     | 6/Dis                      | -                        | -       | Seizure disorder/AFC                    |
| CHRF0068  | (-)        | m/8     | 17-Feb-18           | 0 (0)/20                     | 2/Dis                      | -                        | -       | Meningitis/AFC                          |
| CHRF0080  | (-)        | f/14    | 18-Feb-18           | 4 (0)/20                     | 4/Dis                      | -                        | -       | AFC/AFC                                 |
| CHRF0092  | (-)        | m/11    | 19-Feb-18           | 6 (0)/25                     | 3/Dis                      | -                        | -       | AFC/AFC                                 |
| CHRF0009  | (-)        | m/14    | 19-Feb-18           | 4 (0)/25                     | 5/Dis                      | -                        | -       | AFC/AFC                                 |
| CHRF0021  | water      | f/8     | 28-Feb-18           | 2 (0)/25                     | 4/Dis                      | -                        | -       | AFC/AFC                                 |
| CHRF0033  | water      | -       | 4-Mar-18            | -                            | -                          | -                        | -       | -                                       |
| CHRF0045  | water      | -       | 4-Mar-18            | -                            | -                          | -                        | -       | -                                       |
| CHRF0057  | water      | -       | 4-Mar-18            | -                            | -                          | -                        | -       | -                                       |
| CHRF0069  | water      | -       | 4-Mar-18            | -                            | -                          | -                        | -       | -                                       |
| CHRF0096  | water      | -       | 4-Mar-18            | -                            | -                          | -                        | -       | -                                       |
| CHRF0000  | water      | -       | -                   | -                            | -                          | -                        | -       | -                                       |
| CHRF0081  | Idiopathic | m/72    | 5-Feb-18            | 1100 (40)/350                | /LAMA                      | -                        | -       | Meningitis/Tubercular meningitis        |
| CHRF0093  | Idiopathic | m/13    | 22-Feb-18           | 20 (80)/80                   | 11/Died                    | -                        | -       | Congenital heart disease/Dextrocardia   |
| CHRF0010  | Idiopathic | m/7     | 4-Jan-18            | 314 (80)/40                  | 6/Dis                      | -                        | -       | Meningitis/Meningitis                   |
| CHRF0022  | Idiopathic | m/3     | 8-Jan-18            | 460 (80)/300                 | 9/LAMA                     | -                        | -       | Meningitis/Meningitis                   |
| CHRF0034  | Idiopathic | f/23    | 22-Jan-18           | 70 (70)/150                  | 11/Dis                     | -                        | -       | Meningitis/Meningitis                   |
| CHRF0046  | Idiopathic | f/1     | 28-Jan-18           | 160 (80)/70                  | 4/LAMA                     | -                        | -       | Pneumonia/Pneumonia                     |
| CHRF0058  | Idiopathic | f/160   | 27-Dec-04           | 360 (80)/200                 | 15/LAMA                    | -                        | -       | ICSOL/ICSOL                             |
| CHRF0070  | Idiopathic | m/0     | 14-Dec-17           | 12000 (95)/500               | 15/Dis                     | -                        | -       | Sepsis/Sepsis                           |
| CHRF0082  | Idiopathic | m/4     | 9-Dec-17            | 90 (70)/600                  | 23/Dis                     | -                        | -       | Meningitis/Meningitis                   |
| CHRF0094  | Idiopathic | f/0     | 22-Nov-17           | 1000 (90)/220                | 10/Dis                     | -                        | -       | Meningitis/Meningitis                   |
| CHRF0011  | Idiopathic | m/18    | 5-Nov-17            | 100 (60)/60                  | 9/Dis                      | -                        | -       | Meningitis/Meningitis                   |
| CHRF0023  | Idiopathic | m/4     | 18-Sep-17           | 74 (70)/100                  | 8/Dis                      | -                        | -       | Meningitis/Meningitis                   |
| CHRF0035  | Idiopathic | f/21    | 13-Sep-17           | 600 (90)/700                 | 56/Died                    | -                        | -       | ASS/ASS                                 |
| CHRF0047  | Idiopathic | m/16    | 5-Sep-17            | 2600 (90)/400                | 5/Died                     | -                        | -       | ARI/Meningoencephalitis                 |
| CHRF0059  | Idiopathic | f/4     | 20-Aug-17           | 120 (80)/300                 | 28/Dis                     | -                        | -       | Meningitis/Meningitis                   |
| CHRF0071  | Idiopathic | f/1     | 17-Jun-17           | 180 (80)/250                 | 6/Dis                      | -                        | -       | Meningitis/Meningitis                   |
| CHRF0083  | Idiopathic | m/7     | 12-Aug-17           | 5600 (80)/1000               | 10/Died                    | -                        | -       | Hydrocephalus/Pneumonia                 |

| Sample ID | DSH result       | Age (m) | CSF collection date | WBC/ul (PMN%)/ Protein mg/dl | Hospital duration/ outcome | Organism detected in DSH | qPCR Ct | Provisional/ Final Diagnosis       |
|-----------|------------------|---------|---------------------|------------------------------|----------------------------|--------------------------|---------|------------------------------------|
| CHRF0095  | Idiopathic       | m/98    | 16-Jul-17           | 90 (70)/60                   | 33/LAMA                    | -                        | -       | Meningoencephalitis/ TB meningitis |
| CHRF0012  | Idiopathic       | f/86    | 11-Jul-17           | 180 (60)/55                  | 45/Died                    | -                        | -       | AGN/Meningoencephalitis            |
| CHRF0024  | Idiopathic       | f/96    | 25-Apr-17           | 460 (60)/200                 | 8/LAMA                     | -                        | -       | Meningitis/Meningitis              |
| CHRF0036  | Idiopathic       | m/156   | 23-Apr-17           | 1500 (60)/160                | 10/LAMA                    | -                        | -       | Meningitis/Meningitis              |
| CHRF0048  | Idiopathic       | m/2     | 6-Jun-17            | 3800 (80)/400                | 35/Dis                     | -                        | -       | Meningitis/Meningitis              |
| CHRF0060  | Idiopathic       | m/4     | 4-Jun-17            | 84 (70)/150                  | 11/LAMA                    | -                        | -       | Meningitis/Meningitis              |
| CHRF0072  | Idiopathic       | f/3     | 25-May-17           | 900 (60)/300                 | 44/Dis                     | -                        | -       | Meningitis/Meningitis              |
| CHRF0084  | Idiopathic       | f/4     | 20-May-17           | 70 (60)/250                  | 51/Died                    | -                        | -       | Meningitis/Hydrocephalus           |
| CHRF0097  | PCR (+)          | f/1     | 31-May-17           | 1200 (90)/250                | 12/Dis                     | CHIKV                    | 36.0    | Septicaemia/Meningitis             |
| CHRF0098  | PCR (+)          | m/96    | 31-May-17           | 26 (10)/80                   | 11/Dis                     | CHIKV                    | 38.5    | Encephalitis/Meningitis            |
| CHRF0099  | PCR (+)          | f/11    | 31-May-17           | 20 (20)/30                   | 4/Dis                      | CHIKV                    | 35.0    | AFC/Meningitis                     |
| CHRF0100  | PCR (+)          | m/22    | 14-Jun-17           | 60 (25)/70                   | 2/Dis                      | CHIKV                    | 37.7    | AFC/AFC                            |
| CHRF0101  | PCR (+)          | m/4     | 17-Jun-17           | 160 (70)/110                 | 8/Dis                      | CHIKV                    | 31.3    | AFC/Meningitis                     |
| CHRF0102  | PCR (+)          | m/3     | 17-Jun-17           | 220 (80)/250                 | 15/Dis                     | CHIKV                    | 35.4    | AFC/Meningitis                     |
| CHRF0103  | PCR (+)          | m/93    | 19-Jun-17           | 20 (10)/40                   | 4/Dis                      | CHIKV                    | 33.7    | Meningitis/AFC                     |
| CHRF0104  | PCR (+)          | m/11    | 19-Jun-17           | 20 (10)/30                   | 4/Dis                      | CHIKV                    | 37.9    | Meningitis/AFC                     |
| CHRF0105  | PCR (+)          | f/14    | 21-Jun-17           | 32 (20)/35                   | 2/LAMA                     | CHIKV                    | 31.5    | AFC                                |
| CHRF0106  | PCR (+)          | m/20    | 24-Jun-17           | 120 (90)/70                  | 7/Dis                      | CHIKV                    | 35.1    | Meningitis/AFC                     |
| CHRF0107  | PCR (+)          | m/17    | 29-Jun-17           | 12 (10)/30                   | 3/Dis                      | CHIKV                    | 34.7    | Meningitis/AFC                     |
| CHRF0108  | PCR (+)          | f/8     | 10-Jul-17           | 120 (30)/35                  | 9/Dis                      | CHIKV                    | 35.8    | AFC/Meningitis                     |
| CHRF0109  | PCR (+)          | m/2     | 8-Jul-17            | 24 (70)/50                   | 28/Dis                     | CHIKV                    | 33.8    | Pneumonia/Pneumonia                |
| CHRF0110  | PCR (+)          | m/0     | 10-Jul-17           | 60 (90)/150                  | 16/Dis                     | CHIKV                    | 30.3    | Sepsis/Meningitis                  |
| CHRF0111  | PCR (+)          | m/8     | 18-Jul-17           | 42 (20)/35                   | 7/Dis                      | CHIKV                    | 34.3    | AFC/Meningitis                     |
| CHRF0112  | PCR (+)          | m/7     | 31-Aug-17           | 180 (10)/50                  | 12/Dis                     | CHIKV                    | 29.3    | Meningitis/Meningitis              |
| CHRF0113  | PCR (+)          | m/1     | 18-Sep-17           | 90 (70)/150                  | 17/Dis                     | CHIKV                    | 32.7    | Meningitis/Meningitis              |
| CHRF0114  | Negative - Water | -       | -                   | -                            | -                          | -                        | -       | -                                  |

IC SOL: Intracranial; UTI: Urinary tract infection; ARI: Acute respiratory tract infection; AGN: acute glomerulonephritis; AGE: acute gastroenteritis; AFC: Acute febrile convulsion; ASS: Acute stroke syndrome; NS: Nephrotic syndrome; LAMA: Left against medical advice; NA: the data are not available or applicable
