# Supplementary material for: Unbiased Metagenomic Sequencing for Pediatric Meningitis in Bangladesh Reveals Neuroinvasive Chikungunya Virus Outbreak and Other Unrealized Pathogens
Source: PubMed Central journal article supplement (PMC6918088; doi:10.1128/mbio.02877-19), 2019-12-17
Supplement: mBio.02877-19-st004.pdf [file mBio.02877-19-st004.pdf]

Table S4. List of microbes included in the logistic regression model as potential pathogens.

| <b>Bacteria</b>                   | <b>Viruses</b>              |
|-----------------------------------|-----------------------------|
| <i>Escherichia coli</i>           | Enterovirus                 |
| <i>Shigella spp</i>               | Adenovirus                  |
| <i>Ureaplasma spp</i>             | Influenza A                 |
| <i>Streptococcus pyogenes</i>     | Influenza B                 |
| <i>Salmonella spp</i>             | Parainfluenza-1             |
| <i>Pseudomonas aeruginosa</i>     | Parainfluenza-2             |
| <i>Staphylococcus aureus</i>      | Parainfluenza-3             |
| <i>Streptococcus pneumoniae</i>   | Respiratory syncytial virus |
| <i>Streptococcus agalactiae</i>   | Parechovirus                |
| <i>Klebsiella spp</i>             | Enterovirus                 |
| <i>Haemophilus influenzae</i>     | Human metapneumovirus       |
| <i>Neisseria meningitidis</i>     | Rubulavirus                 |
| <i>Mycoplasma pneumoniae</i>      | Rhinovirus                  |
| <i>Chlamydia trachomatis</i>      | Cytomegalovirus             |
| <i>Chlamydophila pneumoniae</i>   | Mumps virus                 |
| <i>Bordetella pertussis</i>       | Chikungunya virus           |
| <i>Stenotrophomonas spp</i>       | Enterobacter                |
| <i>Acinetobacter spp</i>          | Alphavirus                  |
| <i>Mycobacterium tuberculosis</i> | Human herpesvirus           |
| <i>Bacillus cereus</i>            |                             |
| <i>Elizabethkingia spp</i>        |                             |
