# Supplementary material for: Unbiased Metagenomic Sequencing for Pediatric Meningitis in Bangladesh Reveals Neuroinvasive Chikungunya Virus Outbreak and Other Unrealized Pathogens
Source: PubMed Central journal article supplement (PMC6918088; doi:10.1128/mbio.02877-19), 2019-12-17
Supplement: mBio.02877-19-st005.pdf [file mBio.02877-19-st005.pdf]

Table S5. Case-based metagenomic data derived from all sequenced samples (n=115).

| Sample ID | mNGS output          | Total reads | Nonhost reads | Non-host reads % | No of reads/million of the called pathogen | ERCC reads | RNA input |
|-----------|----------------------|-------------|---------------|------------------|--------------------------------------------|------------|-----------|
| CHRF0052  | <i>E. coli</i>       | 70250230    | 212176        | 0.3              | 465.9                                      | 41572416   | 17.2      |
| CHRF0064  | <i>S. pneumoniae</i> | 71227742    | 308236        | 0.4              | 3008.2                                     | 6063522    | 268.7     |
| CHRF0076  | <i>S. pneumoniae</i> | 63375670    | 98018         | 0.2              | 356.2                                      | 25658770   | 36.7      |
| CHRF0088  | <i>E. anophelis</i>  | 85955422    | 162734        | 0.2              | 116.5                                      | 53048838   | 15.5      |
| CHRF0005  | <i>E. hormaechei</i> | 49785764    | 100862        | 0.2              | 465.9                                      | 23464986   | 28.0      |
| CHRF0017  | 0                    | 44873536    | 71250         | 0.2              | -                                          | 25545366   | 18.9      |
| CHRF0029  | <i>E. anophelis</i>  | 54869610    | 373468        | 0.7              | 5758.7                                     | 46651102   | 4.4       |
| CHRF0041  | <i>K. pneumoniae</i> | 125053116   | 104932        | 0.1              | 21.0                                       | 101372810  | 5.8       |
| CHRF0001  | 0                    | 102302082   | 216946        | 0.2              | -                                          | 33395452   | 51.6      |
| CHRF0013  | 0                    | 12772456    | 93332         | 0.7              | -                                          | 11518604   | 2.7       |
| CHRF0025  | <i>S. pneumoniae</i> | 87017766    | 110194        | 0.1              | 36.0                                       | 15448776   | 115.8     |
| CHRF0037  | <i>S. pneumoniae</i> | 95449142    | 9212          | 0.0              | 7.5                                        | 516        | n/r       |
| CHRF0049  | <i>S. pneumoniae</i> | 63460278    | 72664         | 0.1              | 18.8                                       | 37940022   | 16.8      |
| CHRF0061  | <i>S. pneumoniae</i> | 102545870   | 74388         | 0.1              | 74.2                                       | 25325942   | 76.2      |
| CHRF0073  | <i>S. pneumoniae</i> | 109138694   | 105100        | 0.1              | 554.8                                      | 6998288    | 364.9     |
| CHRF0085  | 0                    | 80961046    | 158908        | 0.2              | -                                          | 49273376   | 16.1      |
| CHRF0002  | <i>S. pneumoniae</i> | 141979356   | 2837444       | 2.0              | 19144.3                                    | 14875054   | 213.6     |
| CHRF0014  | <i>S. pneumoniae</i> | 5138438     | 1520          | 0.0              | 29.7                                       | 47076      | n/r       |
| CHRF0026  | 0                    | 150000000   | 216484        | 0.1              | 659.0                                      | 2209684    | 1670.2    |
| CHRF0038  | <i>S. pneumoniae</i> | 131599198   | 57492         | 0.0              | 15.4                                       | 3102744    | 1035.3    |
| CHRF0050  | 0                    | 71994986    | 231934        | 0.3              | -                                          | 55364152   | 7.5       |
| CHRF0062  | <i>S. pneumoniae</i> | 150000000   | 47112         | 0.0              | 40.9                                       | 4619612    | 786.7     |
| CHRF0074  | <i>S. pneumoniae</i> | 117315916   | 38716         | 0.0              | 5.1                                        | 1435378    | 2018.3    |
| CHRF0086  | <i>S. pneumoniae</i> | 66783636    | 69142         | 0.1              | 82.0                                       | 15896928   | 80.0      |
| CHRF0003  | <i>S. pneumoniae</i> | 56010100    | 88082         | 0.2              | 17.4                                       | 17328160   | 55.8      |
| CHRF0015  | 0                    | 45328346    | 208836        | 0.5              | -                                          | 42675752   | 1.6       |
| CHRF0027  | <i>H. influenzae</i> | 93564596    | 93914         | 0.1              | 56.3                                       | 43933980   | 28.2      |

| Sample ID | mNGS output            | Total reads | Nonhost reads | Non-host reads % | No of reads/million of the called pathogen | ERCC reads | RNA input |
|-----------|------------------------|-------------|---------------|------------------|--------------------------------------------|------------|-----------|
| CHRF0039  | 0                      | 88964960    | 47550         | 0.1              | -                                          | 12434208   | 153.9     |
| CHRF0051  | <i>S. pneumoniae</i>   | 150000000   | 42228         | 0.0              | 64.5                                       | 3295142    | 1113.2    |
| CHRF0063  | <i>N. meningitidis</i> | 83295482    | 338442        | 0.4              | 3.8, 3424.4                                | 5436750    | 358.0     |
| CHRF0075  | <i>S. pneumoniae</i>   | 111766028   | 12132         | 0.0              | 9.3                                        | 774910     | 3580.8    |
| CHRF0087  | <i>S. pneumoniae</i>   | 69829522    | 30968         | 0.0              | 3.1                                        | 7217626    | 216.9     |
| CHRF0004  | 0                      | 60813922    | 237838        | 0.4              | -                                          | 45038786   | 8.8       |
| CHRF0016  | 0                      | 56699154    | 127496        | 0.2              | -                                          | 52922396   | 1.8       |
| CHRF0028  | 0                      | 39764866    | 166378        | 0.4              | -                                          | 37251668   | 1.7       |
| CHRF0040  | 0                      | 85263302    | 282996        | 0.3              | -                                          | 74509638   | 3.6       |
| CHRF0053  | 0                      | 46124002    | 83482         | 0.2              | -                                          | 44273832   | 1.0       |
| CHRF0065  | 0                      | 44707958    | 182912        | 0.4              | -                                          | 41350484   | 2.0       |
| CHRF0077  | 0                      | 75937524    | 102300        | 0.1              | -                                          | 66630914   | 3.5       |
| CHRF0089  | 0                      | 6302354     | 184446        | 2.9              | -                                          | 56770      | n/r       |
| CHRF0006  | 0                      | 80267448    | 145860        | 0.2              | -                                          | 77153088   | 1.0       |
| CHRF0018  | 0                      | 47931332    | 84642         | 0.2              | -                                          | 44741152   | 1.8       |
| CHRF0030  | 0                      | 128845460   | 113374        | 0.1              | -                                          | 120459392  | 1.7       |
| CHRF0042  | 0                      | 56269302    | 88386         | 0.2              | -                                          | 53806038   | 1.1       |
| CHRF0054  | 0                      | 109272300   | 127002        | 0.1              | -                                          | 103557262  | 1.4       |
| CHRF0066  | 0                      | 57896582    | 95220         | 0.2              | -                                          | 54678742   | 1.5       |
| CHRF0078  | 0                      | 42345140    | 63466         | 0.1              | -                                          | 39235528   | 2.0       |
| CHRF0090  | 0                      | 67481750    | 106452        | 0.2              | -                                          | 62447376   | 2.0       |
| CHRF0007  | 0                      | 52481998    | 126918        | 0.2              | -                                          | 49759666   | 1.4       |
| CHRF0019  | 0                      | 9003804     | 46672         | 0.5              | -                                          | 8476152    | 1.6       |
| CHRF0031  | 0                      | 65032886    | 190336        | 0.3              | -                                          | 62205370   | 1.1       |
| CHRF0043  | 0                      | 58224438    | 311660        | 0.5              | -                                          | 53771664   | 2.1       |
| CHRF0055  | 0                      | 65419488    | 115050        | 0.2              | -                                          | 61576086   | 1.6       |
| CHRF0067  | 0                      | 66072270    | 158258        | 0.2              | -                                          | 58759328   | 3.1       |
| CHRF0079  | 0                      | 60221934    | 86664         | 0.1              | -                                          | 52120452   | 3.9       |
| CHRF0091  | 0                      | 68421536    | 123050        | 0.2              | -                                          | 62355960   | 2.4       |

| Sample ID | mNGS output            | Total reads | Nonhost reads | Non-host reads % | No of reads/million of the called pathogen | ERCC reads | RNA input |
|-----------|------------------------|-------------|---------------|------------------|--------------------------------------------|------------|-----------|
| CHRF0008  | 0                      | 56664264    | 127858        | 0.2              | -                                          | 47826772   | 4.6       |
| CHRF0020  | 0                      | 75031264    | 545870        | 0.7              | -                                          | 64841106   | 3.9       |
| CHRF0032  | 0                      | 52942812    | 94000         | 0.2              | -                                          | 50417636   | 1.3       |
| CHRF0044  | 0                      | 74679170    | 126652        | 0.2              | -                                          | 70394724   | 1.5       |
| CHRF0056  | 0                      | 58958602    | 100272        | 0.2              | -                                          | 52111098   | 3.3       |
| CHRF0068  | 0                      | 58263836    | 81770         | 0.1              | -                                          | 53534916   | 2.2       |
| CHRF0080  | 0                      | 58480150    | 77640         | 0.1              | -                                          | 48353780   | 5.2       |
| CHRF0092  | 0                      | 51999596    | 83734         | 0.2              | -                                          | 46960542   | 2.7       |
| CHRF0009  | 0                      | 42981288    | 122776        | 0.3              | -                                          | 39365830   | 2.3       |
| CHRF0021  | 0                      | 38396862    | 145968        | 0.4              | -                                          | 35594906   | 2.0       |
| CHRF0033  | 0                      | 50925620    | 68302         | 0.1              | -                                          | 45749064   | 2.8       |
| CHRF0045  | 0                      | 50455298    | 80706         | 0.2              | -                                          | 48657850   | 0.9       |
| CHRF0057  | 0                      | 50024148    | 95218         | 0.2              | -                                          | 46905102   | 1.7       |
| CHRF0069  | 0                      | 45846480    | 59750         | 0.1              | -                                          | 42479872   | 2.0       |
| CHRF0096  | 0                      | 49342992    | 69600         | 0.1              | -                                          | 46646414   | 1.4       |
| CHRF0000  | 0                      | 135087088   | 156310        | 0.1              | -                                          | 130150782  | 0.9       |
| CHRF0081  | 0                      | 64453194    | 38766         | 0.1              | -                                          | 31709728   | 25.8      |
| CHRF0093  | 0                      | 49670048    | 99216         | 0.2              | -                                          | 43264818   | 3.7       |
| CHRF0010  | <i>Enterovirus B</i>   | 61327650    | 70042         | 0.1              | 9.3                                        | 22230004   | 44.0      |
| CHRF0022  | 0                      | 118348946   | 181994        | 0.2              | -                                          | 70802894   | 16.8      |
| CHRF0034  | 0                      | 60169132    | 112136        | 0.2              | -                                          | 13310622   | 88.0      |
| CHRF0046  | 0                      | 42195836    | 158576        | 0.4              | -                                          | 25483100   | 16.4      |
| CHRF0058  | <i>M. tuberculosis</i> | 65072802    | 34314         | 0.1              | 9.5                                        | 3104784    | 499.0     |
| CHRF0070  | <i>B. cereus</i>       | 69060574    | 98978         | 0.1              | 247.4                                      | 5797930    | 272.8     |
| CHRF0082  | <i>S. enterica</i>     | 60637346    | 98414         | 0.2              | 97.8                                       | 19935498   | 51.0      |
| CHRF0094  | CHIKV                  | 61336096    | 412890        | 0.7              | 5495.9                                     | 28094424   | 29.6      |
| CHRF0011  | Mumps                  | 60553510    | 25850         | 0.0              | 0.7                                        | 7677666    | 172.2     |
| CHRF0023  | 0                      | 53928028    | 285306        | 0.5              | -                                          | 38094584   | 10.4      |

| Sample ID | mNGS output                   | Total reads | Nonhost reads | Non-host reads % | No of reads/million of the called pathogen | ERCC reads | RNA input |
|-----------|-------------------------------|-------------|---------------|------------------|--------------------------------------------|------------|-----------|
| CHRF0035  | Human herpes virus 6 (manual) | 96343858    | 16208         | 0.0              | -                                          | 1643200    | 1440.8    |
| CHRF0047  | 0                             | 57593626    | 54800         | 0.1              | -                                          | 6349378    | 201.8     |
| CHRF0059  | <i>S. maltophilia</i>         | 85986872    | 1362544       | 1.6              | 3240.9                                     | 38318362   | 31.1      |
| CHRF0071  | CHIKV                         | 58234020    | 85112         | 0.1              | 242.8                                      | 23316766   | 37.4      |
| CHRF0083  | 0                             | 139233556   | 48796         | 0.0              | -                                          | 286176     | n/r       |
| CHRF0095  | 0                             | 61324940    | 84592         | 0.1              | -                                          | 19572240   | 53.3      |
| CHRF0012  | CHIKV                         | 8760674     | 56784         | 0.6              | 1830.1                                     | 3462238    | 38.3      |
| CHRF0024  | 0                             | 98585738    | 86354         | 0.1              | -                                          | 20945142   | 92.7      |
| CHRF0036  | Mumps (manual)                | 72872708    | 62864         | 0.1              | 0 rpm, 2 total reads                       | 8675260    | 185.0     |
| CHRF0048  | 0                             | 77389688    | 62590         | 0.1              | -                                          | 58257176   | 8.2       |
| CHRF0060  | 0                             | 81192516    | 193074        | 0.2              | -                                          | 70471964   | 3.8       |
| CHRF0072  | 0                             | 150000000   | 89218         | 0.1              | -                                          | 31927140   | 92.1      |
| CHRF0084  | 0                             | 59849024    | 57728         | 0.1              | -                                          | 49233396   | 5.4       |
| CHRF0097  | CHIKV                         | 150000000   | 120342        | 0.1              | 24.9                                       | 130431532  | 3.8       |
| CHRF0098  | CHIKV                         | 150000000   | 187842        | 0.1              | 20.9                                       | 141728870  | 1.5       |
| CHRF0099  | CHIKV                         | 150000000   | 414592        | 0.3              | 6423.7                                     | 136277954  | 2.5       |
| CHRF0100  | CHIKV                         | 150000000   | 311012        | 0.2              | 8.0                                        | 95075520   | 14.4      |
| CHRF0101  | CHIKV                         | 150000000   | 1632694       | 1.1              | 20200.8                                    | 96521140   | 13.9      |
| CHRF0102  | CHIKV                         | 150000000   | 436436        | 0.3              | 111.5                                      | 113727008  | 8.0       |
| CHRF0103  | CHIKV                         | 150000000   | 381190        | 0.3              | 3254.2                                     | 121280236  | 5.9       |
| CHRF0104  | CHIKV                         | 150000000   | 371278        | 0.2              | 106.0                                      | 116330080  | 7.2       |
| CHRF0105  | CHIKV                         | 150000000   | 228930        | 0.2              | 881.3                                      | 105689416  | 10.5      |
| CHRF0106  | CHIKV                         | 150000000   | 359446        | 0.2              | 4169.4                                     | 117445236  | 6.9       |
| CHRF0107  | CHIKV                         | 150000000   | 171530        | 0.1              | 966.1                                      | 138854562  | 2.0       |
| CHRF0108  | CHIKV                         | 150000000   | 241328        | 0.2              | 248.9                                      | 131571546  | 3.5       |
| CHRF0109  | CHIKV                         | 150000000   | 157336        | 0.1              | 565.6                                      | 138399578  | 2.09      |
| CHRF0110  | CHIKV                         | 150000000   | 6795359       | 4.5              | 37386.1                                    | 16650300   | 200.3     |
| CHRF0111  | CHIKV                         | 150000000   | 223136        | 0.1              | 1065.6                                     | 136500544  | 2.5       |

| <b>Sample ID</b> | <b>mNGS output</b> | <b>Total reads</b> | <b>Nonhost reads</b> | <b>Non-host reads %</b> | <b>No of reads/million of the called pathogen</b> | <b>ERCC reads</b> | <b>RNA input</b> |
|------------------|--------------------|--------------------|----------------------|-------------------------|---------------------------------------------------|-------------------|------------------|
| CHRF0112         | CHIKV              | 150000000          | 25772                | 0.0                     | 3.0                                               | 319182            | n/r              |
| CHRF0113         | CHIKV              | 150000000          | 1357528              | 0.9                     | 34.8                                              | 72993550          | 26.7             |
| CHRF0114         | 0                  | 150000000          | 231476               | 0.2                     | -                                                 | 139254112         | 1.9              |

n/r: the RNA input could not be back-calculated from ERCC counts.
